# Supplementary material for: Multiparticulate Systems of Meloxicam for Colonic Administration in Cancer or Autoimmune Diseases
Source: MDPI journal article supplement (doi:10.3390/pharmaceutics14071504), 2022-07-20
Supplement: s1 [file s1]

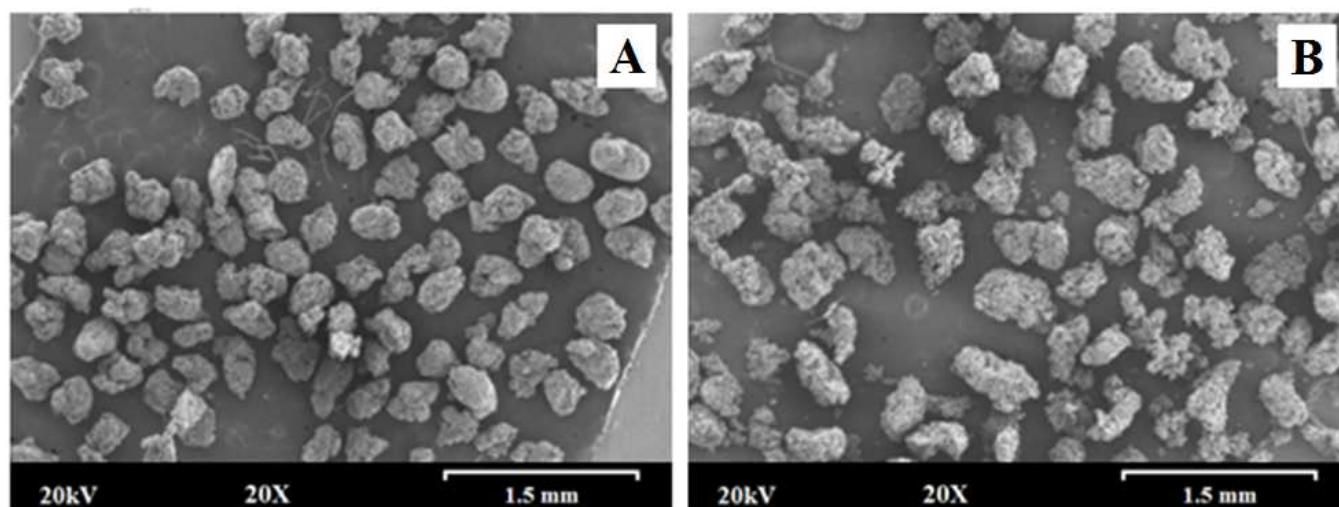

**Figure S1.** Scanning electron micrographs of CNM multiparticulate system and its blank formulation, at a magnification of 20 $\times$  and the scale bar is equal to 1.5 mm: (A) CNM multiparticulate system; (B) blank CNM formulation.

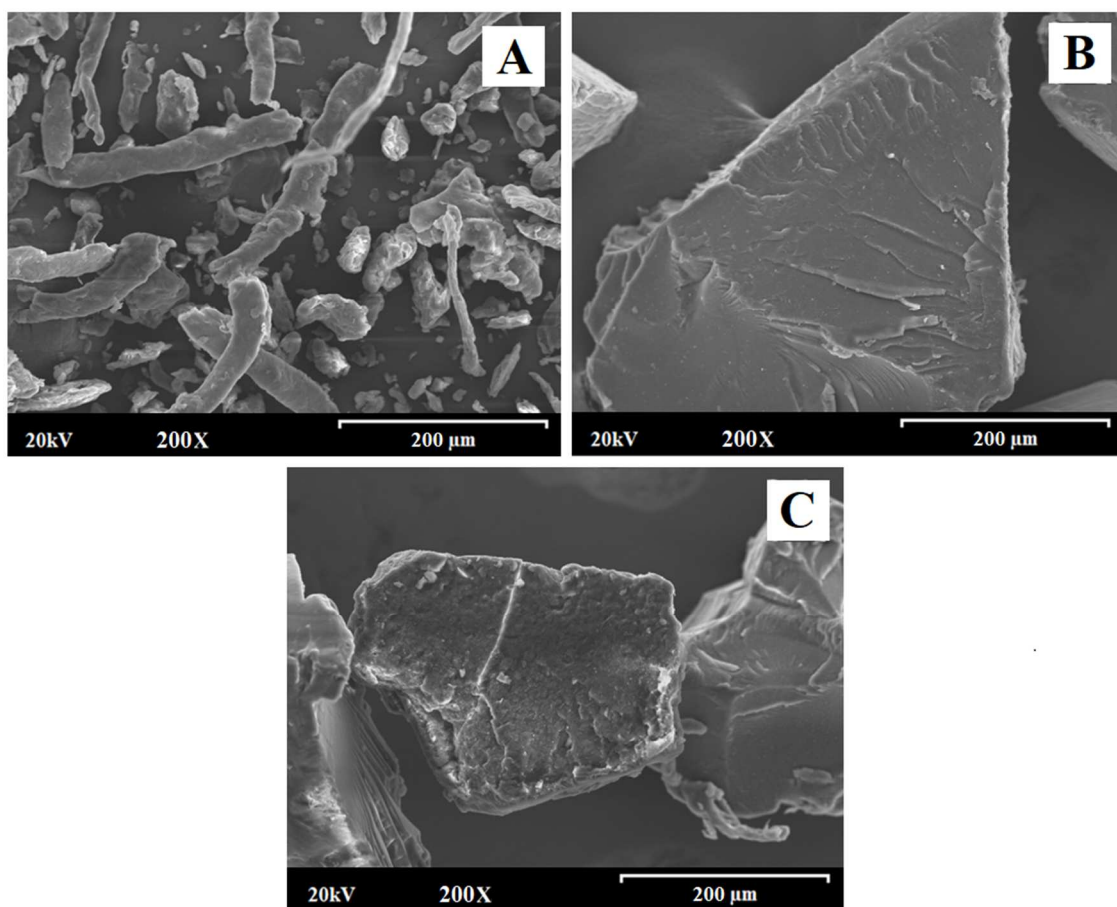

**Figure S2.** Scanning electron micrographs of polymers at a magnification of 200× and the scale bar is equal to 200 μm: (A) Metolose®; (B) Eudragit®FS and (C) Eudragit®NM.

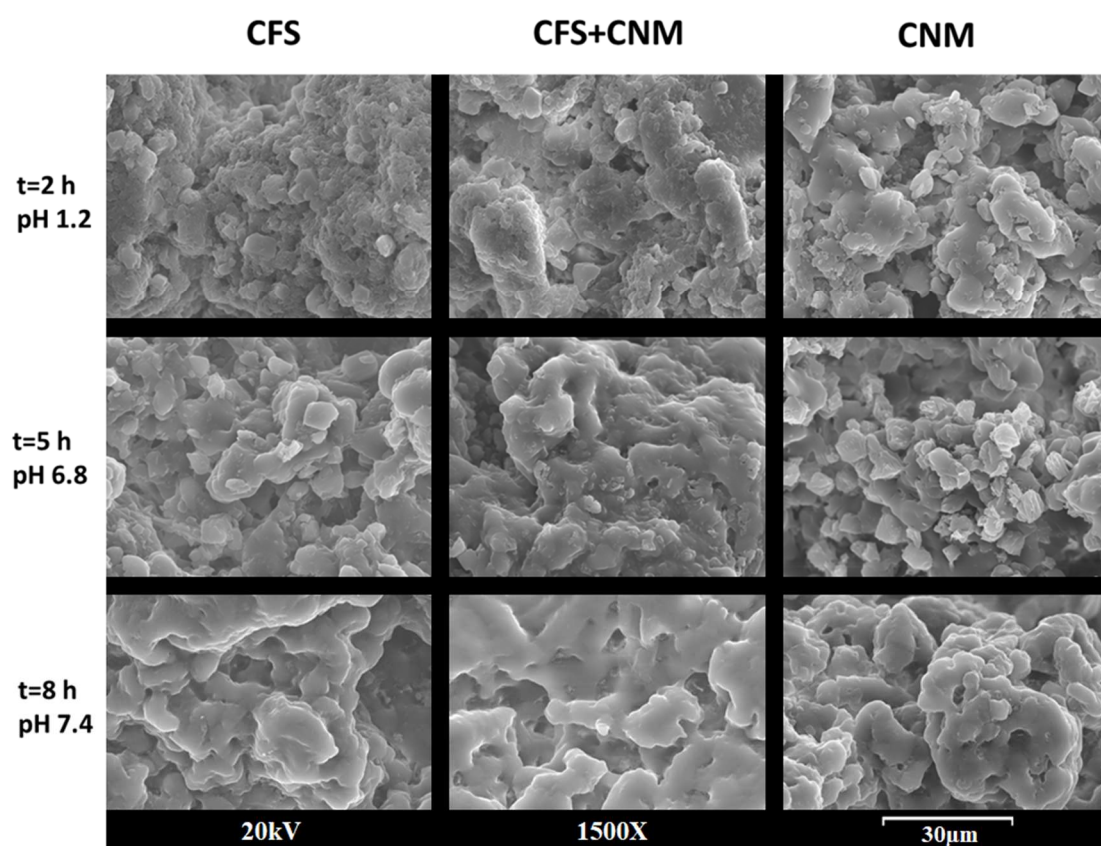

**Figure S3.** Scanning electron micrographs of CFS, CNM + CFS and CNM multiparticulate systems, after 2 h at pH 1.2; 3h at pH 6.8 and 3 h at pH 7.4. Original magnification is 1500x and the scale bar is equal to 30μm.
